# Supplementary material
Source: HighWire-hosted journal article supplement (https://ez-admanager.com/highwire/filestream/135267/field_highwire_adjunct_files/0/nevalainen_1968.pdf)
Supplement: nevalainen_1968.pdf [file nevalainen_1968.pdf]

# 뇌전증과 연관된 임상적 특징과 사망률

## 체계적 리뷰와 메타 분석

### Epilepsy-related clinical characteristics and mortality

#### A systematic review and meta-analysis

Olli Nevalainen  
Hanna Ansakorpi, MD,  
PhD  
Mikko Simola  
Jani Raitanen, MSc  
Jouko Isojärvi, MD, PhD  
Miia Artama, MSc, PhD  
Anssi Auvinen, MD, PhD

**목적:** 뇌전증 환자(patients with epilepsy, PWE)에서 뇌전증과 연관된 임상적 특징을 메타 분석한 사망률에 대한 역학적 연구를 체계적으로 종합하였다.

**방법:** 체계적으로 15개의 전자 데이터베이스의 관련 문헌에 있는 참고 목록을 열람하고 현장에서 저자와 접촉하여 조사하였다. 일반 인구와 비교하여 뇌전증 대표 인구에서 사망의 상대위험도를 연구한 코호트 연구에 관심이 있었다. 지적 장애나 뇌전증 수술 사례들과 같은 PWE에서 고도로 선택된 소집단에 대한 연구는 제외하였다. 조사, 자료 추출, 그리고 Newcastle-Ottawa Scale을 이용한 연구의 질적 평가는 모두 중복 시행하였다.

**결과:** 통합 사망률은 165,879명의 환자(79.6%는 북유럽 지역)를 포함하는 38개의 뇌전증 코호트에서 세 배(상대위험도 3.33, 95% CI 2.83~3.92)로 나타났다. 사건성 사례 중, 특발성 뇌전증은 실질적인 사망률 증가와 관계가 없었지만(1.29, 0.75~2.20; 4개 연구들), 잠복성 뇌전증에서는 사망률이 2배였고(1.75, 1.20~2.54; 5개 연구), 증상성 뇌전증 환자에서는 매우 높았고(4.73, 3.27~6.83; 12개 연구), 선천성 또는 발달장애에 의한 뇌전증의 경우 특히 높았다(10.3, 4.03~26.2; 2개 연구). 발작이 소실된 새로이 진단된 환자에서는 사망률이 증가하지 않았다(0.97, 0.73~1.30; 2개 연구).

**결론:** 초과 사망률은 모든 연령에서 뇌전증의 병인과 연관성이 매우 높았다. 신경영상학적 이상 또는 다른 확인 가능한 원인이 없는 성인 뇌전증 환자에서 잠복성 뇌전증 환자만이 사망률이 증가하는 것으로 나타났다. 특발성 뇌전증과 발작이 소실된 PWE에서 조기 사망의 위험도가 가장 낮았다.

Neurology® 2014;83:1968-1977

뇌전증은 전세계적으로 68,000,000명 이상의 환자가 있는 흔한 만성 뇌질환으로,<sup>1</sup> 장애-조정 생애(disability-adjusted life years)에 0.7%로 기여한다.<sup>2</sup> 관찰연구들은 뇌전증 환자(patients with epilepsy, PWE)의 사망률 증가에 이전 증상성 뇌전증의 흔한 원인이 되는 종양뿐만 아니라 뇌혈관 질환이 주를 이루는 만성 퇴행성 질환의 뇌 증상과 관련되어 있다.<sup>3,4</sup> 또한, PWE는 사고나 자살과 같은 외부적 요인에 의해서도 사망률이 증가한다.<sup>4,5</sup> 그리고, PWE의 특정 병태생리학적 기전은 특히 재발성 전신 발작의 발생빈도가 가장 높은 초기 성인기에 갑작스러운 사망을 유발한다.<sup>6</sup>

사망률은 질병의 예후에 중요한 특징이며, 나쁜 예후와 관계된 뇌전증의 특성을 잘 알고 있어야 하는 뇌전증을 치료하는 의사에게 중요하다. 뇌전증은 병인, 발작 유형, 특정 뇌전증 증후군, 그리고 발생 연령에 따라 분류가 다양한 뇌질환 그룹이며, 이러한 이유로 예후가 다양하다. 뇌전증과 관련된 특성과 사망률을 출판된 모든 근거를 양적으로 통합하여 평가한 체계적인 문헌 검토는 이전에 시도된 바가 없다.

## 방 법

### 자료 출처와 조사

여기서는 뇌전증과 연관된 사망률 증가의 병인에 대해 Meta-analysis of Observational Studies in Epidemiology뿐만 아니라 Preferred Reporting Items for Systematic reviews and Meta-Analyses에 제시된 가이드라인에 따라 병렬적으로 자동화된 체계적인 문헌조사를 시행하였다.<sup>7,8</sup> 연구 프로토콜은 선형적으로 발표되지 않았다.

2013년 7월, 두 명의 저자(O.N.과 H.A. 또는 M.S.)는 15개의 전자 데이터베이스를 관련 있는 출판물에 대해 통찰력을 가지고 체계적으로 조사하였다. 조사는 2013년 12월 1일 O.N.이 업데이트 하였다. 데이터베이스는 Medline (Ovid), Scopus, Web of Science, PsycINFO, Cochrane Library, CINAHL, IngentaConnect와 African Index Medicus, Literatura Latino-Americana e do Caribe em Ciências Da Saúde (LILACS), Index Medicus for Eastern Mediterranean Region (IMEMR), Index Medicus for South-East Asia Region (IMSEAR), Western Pacific Region Index Medicus (WPRIM)가 포함된 WHO Global Health Library의 지역 색인, 그리고 Virtual Health Library에서 Bibliographic Index on Health Sciences from Spain (IBECS), Scientific Electronic Library Onlines (SciELO),

Caribbean Health Sciences Literature (MedCarib)가 포함되었다. 가장 민감도가 높은 검색 구문은 epilep\* (epilepsy, epileptic 그리고 epilepsies를 포함)과 사망률(mortality)이었고, 가능한 경우 본문 단어와 Medical Subjects Heading으로 모두 검색하였다.

Tampere와 Oulu 대학의 도서관에서 다른 곳에서는 불가능했던 잠재적으로 연관된 문헌의 전문을 확인하였고, 필요하다면 어떠한 언어로 기술된 출판물도 번역하였다. 제목, 초록 또는 전문에 각각 기반을 둔 계층적 접근을 통해 연구의 타당성을 평가하였다. 세 번의 독립적인 심사 후, 연구 선택에 대한 공정한 평가자 사이의 합의(Cohen kappa 0.349)를 도출하였고, O.N., H.A., 그리고 M.S.는 마지막으로 잠재적으로 관련이 있을 것으로 여겨지는 연구에 대해서 긴밀하게 의논하였다. 연관된 연구를 놓치지 않았다는 것을 확인하기 위해, 연관된 출판물의 도서관 목록 상의 참고 문헌들을 검색하고 직접적으로 저자와 이메일을 통해 접촉하여 누락된 연구에 대해 문의하였다. 10개의 답변으로 이루어진 직접 저자 질문서에 누락된 출판물은 표기되지 않았다.

### 연구 선택

선택적으로 (1) PWE의 포괄적인 케이스를 추적관찰한 코호트 연구, (2) 비교 효과 평가(예: 표준사망률[standardized mortality ratio, SMR] 또는 위험도[hazard ratio, HR]와 같은 비교 위험도를 추정) (3) 일반 인구 또는 뇌전증이 없는 대표 코호트와 비교한 모든 원인으로 인한 사망률 (4) 95% 신뢰구간[confidence intervals, CIs] 또는 CIs를 산출할 수 있는 자료가 있는 연구를 포함하였다. 환자 대조군 연구와 코호트 연구를 포함시킨 근거는 예후를 평가하는 역학 연구에서 일반적으로 선호되기 때문이다.<sup>9</sup> 이전 뇌전증 지속상태, 급성 증상성 발작 또는 지능장애, 영구적으로 시설에서 생활하는 환자, 항뇌전증약의 시판 후 연구 코호트에 포함된 환자, 미주신경 자극술이나 수술적 뇌전증 치료의 추적관찰 대상이 되는 환자와 같이 고도로 선택된 소집단에 대한 연구는 배제하였다. 첫 번째 유발원인이 없는 발작 환자의 구성이 코호트의 30%에 달하는 연구는 포함하였다. 뇌전증은 두 번 이상의 유발원인이 없는 간질성 발작이 최소 24시간 이상의 간격을 두고 발생한 경우로 첫 번째 유발원인이 없는 발작과 International League Against Epilepsy (ILAE)에 의해 제안된 운영적 정의를 이용하여 구분되어야 한다.<sup>10</sup> 단일 뇌전증 코호트에 대한 여러 출판물이 있는 경우, 가장 추적관찰 기간이 긴 연구 또는 필요하다면 코호트의

특성을 완전히 설명하기 위해 같은 코호트를 여러 번 인용하였다(table e-1 on the Neurology® Web site at Neurology.org).

### 자료의 추출과 질 평가

자료는 사전 검사를 거친 자료 추출 형식을 이용하여 중복으로 편집하였고 일치되지 않는 사항에 대해서는 토론을 통하여 결정하였다. 각 연구에서 아래와 같은 사항을 포함한 자료를 추출하였다: 저자, 출판 연도, 연구 집단의 지역(나라, 도시 또는 지역), 등록 연도, 추적관찰 종료 일자, 코호트 중간 연도, 코호트 종류(병원 표본 또는 인구기반 표본), 사례 등록 유형(전향적 또는 후향적, 사건성 또는 유행성), 추적관찰의 기간, 인년, 비교 효과 측정의 종류(SMR, HR), PWE의 수, 사망 수, 연령 범위, 뇌전증의 병인, 발작의 빈도, 뇌전증증후군, 그리고 발작의 종류. 또한, 우리는 ILAE에 개정된 제안에 따라 뇌전증의 병인을 분류하여 새로이 출판된 것이 있는지 확인하였다.<sup>11</sup>

개별성 사례는 새로 PWE가 진단된 것으로 하고 진단 시점에서 추적관찰을 시작하였다. 유행성 사례는 진단이 된 이후 다양한 시점에서 추적관찰을 시작하고 치료를 하고 있는 PWE였다. 특별뇌전증이 증상성 뇌전증과 별도로 확인되면, 명시되지 않았거나 잠복병인으로 분리된 그룹이 있다면 잠복뇌전증이 있는 특별뇌전증의 하위그룹으로 분류하였다. 이러한 방대한 병인의 범주를 이분화하는 것은 특히 장기간 추적관찰하는 연구에서 흔한 것으로 알려져 있다.<sup>10</sup> 무증상성 뇌전증(예: 특별 그리고 잠복)은 어떤 신경영상학적 이상소견도 없는 경우로 정의하였다. 특별뇌전증은 유전적 감수성이 원인으로 추정되거나 알려져 있으며, 일차적으로 유년기부터 초기 성인기에 발생한다.<sup>10,11</sup> 잠복뇌전증은 어떤 뇌전증증후군에도 맞지 않고 임상적으로 국소 발생 발작으로 나타난다. 발작 빈도에 따라 사망률이 다양하게 보고되므로, 최고 빈도의 발작률과 최저 빈도의 발작률(관해된 환자를 포함)에 따라 이분화된 변수를 만들었다.

UN Human Development Index (HDI)는 각각의 연구 국가를 개발 상태에 따라 매우 높은, 높은, 중간, 낮은 수준으로 구분하였다.<sup>12</sup> 각각 개별적인 연구 수준에서, 선택, 비교, 그리고 결과의 도메인에서 Newcastle-Ottawa Scale (NOS)을 이용하여 바이어스의 위험도를 평가하였다. NOS 점수(별점으로 불리는)는 1~3, 4~6 그리고 7~9로 구분되어 있고 근거의 질로는 각각 낮은, 중간, 높은 것으로 표기되었다(table e-2).<sup>13</sup> 각 영역에서 전반적인 근거의 수준은 Grading of Recommendations Assessment,

Development and Evaluation (GRADE)에 따라 평가하였다.<sup>14</sup> 이것은 바이어스, 불일치, 근거의 간접성과 비정확성, 투여 반응, 교란의 위험도와 효과의 크기를 포함하였다(table e-3).

### 자료 통합과 분석

연구는 SMR 또는 HR을 효과 측정으로 제시하였고, 이것은 주요 종합 척도로서 상대위험도(relative risk, RR)의 추정치를 고려하였다. RR의 자연로그를 계산에 사용하였고,<sup>15</sup> 이후, 역대수를 위험비의 표현으로 계산하였다.

환자 선택, 참조그룹, 그리고 치료 방향에 있어 잠재적인 다양성은 무작위-효과 모델을 이용한 추정치를 통합하기 위해 우선적으로 확인하였다.  $I^2$  이종성 검사를 추정치( $IQ - \text{degrees of freedom}$ )/ $Q \times 100\%$ 과  $\chi^2$  분포를 대표하는 Q 사이의 통계적 불일치성의 크기를 결정하기 위해 시행하였다.<sup>16</sup> 메타분석은 연구 수준의 공변량을 이용한 연구-특이 추정치의 체계적인 변화를 조사하기 위해 메타-회귀로 확장하였다. 출판 바이어스는 funnel plot,  $\alpha$  수준 0.10의 Egger test,<sup>17</sup> Galbraith plot<sup>18</sup>을 이용하여 나타냈다. 분석은 STATA 11.0 (StataCorp, College Station, TX)을 이용하였다.

### 결과 조사 결과

15개의 전자데이터베이스(figure 1)에서 12,210개의 인용문헌을 확인하였다. 영어, 프랑스어, 스페인어, 폴란드어, 러시아어 또는 핀란드어로 출판된 전문은 그들의 잠재적 연관성을 평가하였다. 일차 조사에서 이 연구의 포함 기준을 만족하는 36개의 출판물에서 37개의 뇌전증 코호트를 확인하였고, 하나의 연구<sup>19</sup>는 참고문헌 목록을 검토하여 확인되었다(table e-1).<sup>20-55</sup>

이들 뇌전증 코호트는 165,879명의 환자를 추적관찰하였고 이 중 131,982명(79.6%)은 북유럽 국가의 환자였다. 뇌전증 코호트는 대부분 자원이 풍부한 나라의 인구로 구성되었고; 29개(76%)의 나라는 UN HDI가 매우 높은 국가였다. 대표적인 전국적 사망률 추정치는 덴마크,<sup>46,51</sup> 핀란드,<sup>20,54</sup> 그리고 아이슬란드<sup>24</sup>에서만 평가가 가능하였다. 이 코호트 중 22개는 기저 인구에서 인구 기반 PWE 대표 코호트이다.<sup>21,24,26-28,30,32,33,36-38,40-46,48,51-53</sup> 대표성이 높은 네 개의 코호트는 불완전한 사례 파악에 동반되는 위험도가 있는 것을 단일 출처로 이용하였다.<sup>20,29,50,54</sup> 예를 들면, 두 코호트는 영구적으로 시설에 있는 PWE를 자동적으로 확인하지 않는 전국적 핀란드 약물 상환 레지스트리에 기반하였다.<sup>20,54</sup> 게다가, 12개의 코호트는 병원 방문이나 특별한 클리닉에 기반하여 불응성 뇌전증 환자의 비율이 높아 선택 바이어스의 영향을 받을 수 있었다.<sup>19,22,23,25,31,32,34,35,39,47,49,55</sup> 그러나, 인구기반 연구들과 다른 연구들에서 추정치의 크기는 차이가 없었다( $p=0.56$ ;  $I^2$  98.67%).

하나의 연구<sup>20</sup>에 대해서, 보고된 관찰되거나 예측된 사망에 기반하고, 사망의 푸아송 분포(Poisson distribution)를 가정한 95% CI를 통해 SMR을 산출하였다. 하나의 연구는 과거의 뇌졸중과 항뇌전증약물 사용으로 증화한 사망률의 모든 HRs를 보고하였다.<sup>46</sup> 통합 HR은 이 코호트의 사망률 추정치의 평균을 이용하여 산출하였다.

### 사망률

북유럽 국가의 10개 코호트에서 통합 초과 사망률(figure 2)은 2.87 (2.16~3.81;  $I^2$  99.7%)이었고,<sup>19,20,23,24,26,40,46,47,51,54</sup> 다른 연구들은 3.66 (2.87-4.66;  $I^2$  97.5%)이었다. 사망률은 남성(RR 3.16,

Figure 1 Systematic literature review

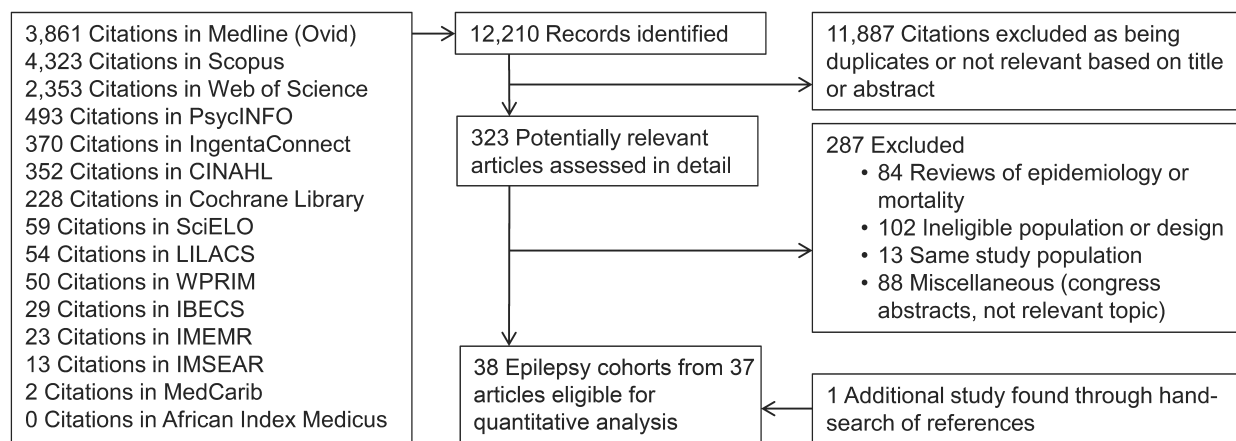

Figure 2 Forest plot on excess mortality

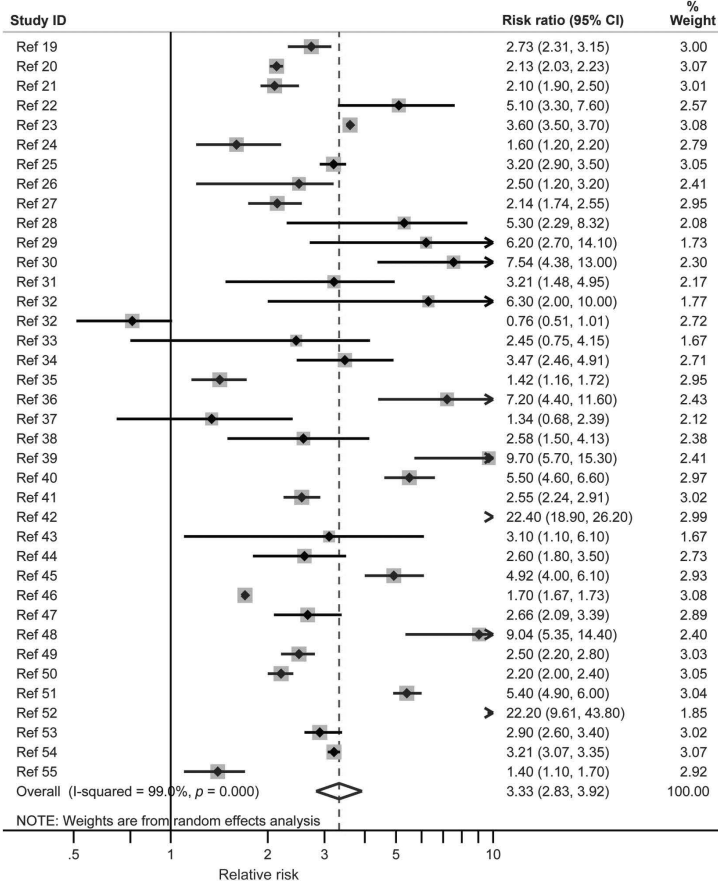

CI = confidence interval.

2.69~3.72;  $I^2$  76.4%)과 여성(RR 2.85, 2.57~3.17;  $I^2$  33.5%) PWE에서 비슷한 정도로 증가하였고, 또한 PWE 표본에서 개별성(3.17, 2.72~3.70;  $I^2$  95.3%)과 유행성(3.15, 2.45~4.04;  $I^2$  99.4%)에서도 유사하게 증가하였다. 소아 뇌전증 환자에서 초과 사망률이 최고(figure 2)였는데 일반적으로 뇌전증이 없는 소아의 사망률이 매우 낮기 때문이다. 단변량 메타 회귀분석에서, UN HDI는 매우 높은 HDI가 참고 카테고리일 때 초과 사망률과 관계가 없었고( $I^2$  99.1%), RR은 각각 높은 HDI 카테고리에서 0.74 (0.25~2.18), 중간에서 0.59 (0.30~1.17), 낮은 카테고리에서 1.88 (0.62~5.71)이었다. 북미의 연구들은 유럽의 연구보다 사망률이 높은 것으로 나타났는데 이는 유럽보다 소아 뇌전증 환자의 비율이 높기 때문이다.<sup>28,30,48,52</sup>

최근 제시된 ILAE에 따라 뇌전증의 병인을 분류한 출판물은 없었다.<sup>11</sup> 특발<sup>40,43</sup> 또는 특발/잠복<sup>24,28,30,40</sup> 뇌전증을 <20세에 진단받은 개별성 사례에 대한 인구기반 연구들은 초과 사망률을 보여주지 못했다(figure 3). 핀란드의 소아 코호트는 이 연령 그룹에서 개별성 잠복뇌전증의 사망률(SMR 1.42, 0.64~3.16) 자료가 있는 유일한 인구기반 표본이다(personal communication, M.Sillanpää, 2013).<sup>40</sup> 소아병원 기반 발생 표본에 대한 추가적인 고려는 특발/잠복뇌전증(meta-RR 1.41, 0.87~2.28)의 추정 사망률을 변화시키지 않았지만, 일부는 증상성

Table 1 Determinants of mortality in epilepsy in a meta-regression covering all studies and studies from countries with very high UN Human Development Indices

|                                            | All studies |                    |            |           | Very high HDI |                    |            |           |
|--------------------------------------------|-------------|--------------------|------------|-----------|---------------|--------------------|------------|-----------|
|                                            | No. studies | R <sup>2</sup> , % | RR         | 95% CI    | No. studies   | R <sup>2</sup> , % | RR         | 95% CI    |
| Year of publication <sup>a</sup>           | 38          | 0.48               | 1.01       | 0.99-1.04 | 29            | 4.41               | 1.02       | 0.99-1.04 |
| Midcohort year                             | 37          | 4.88               | 1.01       | 0.99-1.03 | 29            | 8.51               | 1.02       | 1.00-1.04 |
| Continent                                  | 38          | 8.29               | —          | —         | 29            | 2.73               | —          | —         |
| Europe                                     | 21          | —                  | 1.00 (Ref) | —         | 20            | —                  | 1.00 (Ref) | —         |
| North America                              | 5           | —                  | 2.11       | 1.04-4.28 | 5             | —                  | 2.03       | 0.99-4.15 |
| South America                              | 4           | —                  | 0.90       | 0.40-2.04 | 2             | —                  | 0.88       | 0.28-2.71 |
| Asia                                       | 6           | —                  | 0.81       | 0.43-1.52 | 2             | —                  | 0.90       | 0.33-2.48 |
| Africa                                     | 2           | —                  | 2.17       | 0.73-6.47 | 0             | —                  | —          | —         |
| Follow-up length, y                        | 38          | -6.02              | —          | —         | 29            | -3.09              | —          | —         |
| <10                                        | 12          | —                  | 1.00 (Ref) | —         | 7             | —                  | 1.00 (Ref) | —         |
| 10-20                                      | 15          | —                  | 0.94       | 0.53-1.67 | 11            | —                  | 1.38       | 0.69-2.77 |
| >20                                        | 11          | —                  | 0.93       | 0.50-1.72 | 11            | —                  | 1.06       | 0.53-2.13 |
| Age distribution                           | 38          | 42.36              | —          | —         | 29            | 56.14              | —          | —         |
| Only children or adolescents               | 9           | —                  | 1.00 (Ref) | —         | 9             | —                  | 1.00 (Ref) | —         |
| Children, adolescents, and adults          | 6           | —                  | 0.32       | 0.17-0.60 | 2             | —                  | 0.35       | 0.16-0.73 |
| All age groups                             | 18          | —                  | 0.34       | 0.21-0.54 | 13            | —                  | 0.32       | 0.20-0.50 |
| Only adults and elderly                    | 5           | —                  | 0.33       | 0.17-0.63 | 5             | —                  | 0.33       | 0.19-0.57 |
| Newcastle-Ottawa Score, total <sup>a</sup> | 38          | -3.06%             | 1.00       | 0.86-1.16 | 29            | -2.73              | 1.6        | 0.88-1.28 |

Abbreviations: CI = confidence interval; R<sup>2</sup> = degree of variance in mortality associated with a particular variable; RR = relative risk.

<sup>a</sup> Continuous variable.

뇌전증의 추정 위험도를 증가시켰다(meta-RR 14.7, 5.6~38.59).<sup>39</sup> 성인기에 발생한 증상성 뇌전증의 사례(*figure 3*)에서, 개별성 사례에 대한 추가적인 두 개의 병원기반 연구에 대한 고려<sup>34,35</sup>(meta-RR 2.87, 1.66~4.98)와 유행성 사례에 대한 하나의 연구<sup>47</sup>(meta-RR 2.98, 1.92~4.61)에 대한 고려는 사망률 추정치를 약간 감소시켰다. 성인과 노인에서 개별성 특발/잠복뇌전증은 인구기반 연구에서 사망률의 증가와 관계가 없었고(*figure 3*),<sup>24,26,56</sup> 병원기반 개별성 코호트를 포함시키는 것은 결과를 변화시키지 않았다(meta-RR 1.27, 0.96~1.68). 에스토니아의 연구는 성인의 개별성 잠복뇌전증에서 인구기반 사망률 추정치를 유일하게 보고하였다(SMR 2.1,1.1~3.6).<sup>44</sup> 성인 잠복뇌전증 환자에서 다른 3개의 추정치는 4개 연구의 통합 추정치 1.82 (1.17~2.82; *I*<sup>2</sup> 67.8%)의 병원 표본이었다.

사망률은 발작이 없는 개별성 사례에서 증가하지 않았고,<sup>35,40</sup> 유행성 표본을 포함하면 낮은 발작 빈도에서는 약간 증가하는 것으로 나타났다(*table 2*).<sup>19,35,36,40,47,50</sup> ILAE의 1989 International Classification of the Epilepsies Commission on Classification and Terminology로 확인된 뇌전증 증후군에 의한 사망 위험도를 보고한 연구는 포함되지 않았다.<sup>57</sup>

7개의 연구는 발작의 전체적인 국소화를 통하여 일반 인구와 비교한 사망률을 보고하였다.<sup>19,24,26,44,47,50,58</sup> 이 연구들 중 4개의 연구에서 발작의 유형은 최신 기준에 따라 분류되지 않았고,<sup>19</sup> 신뢰구간이 보고되지 않았으며,<sup>58</sup> 특발뇌전증 환자에서만 발작의 유형이 보고되었고,<sup>24</sup> 성별에 대해 층화하여 분석한 연구는 하나밖에 없었고, 통계적으로 유의한 추정치만 보고하였다.<sup>26</sup> 나머지 3개의 연구에서 부분 발작은 두 개의 병원기반 연구에서 유사하게 보고되었고,<sup>47,50</sup> 하나의 인구기반 연구는 더 자세한 분류를 이용하였다.<sup>44</sup> 일차 전신 발작은 사망률이 보고되지 않거나<sup>44</sup> 전신 강직-간대 발작에서만 부분 발작의 이차 전신화와 구분 없이 보고하여 별도로 분석할 수 없었다.<sup>50</sup> 핀란드의 3차 치료기관을 대상으로 한 코호트 연구<sup>47</sup>는 부분 발작 또는 일차 전신 발작으로 ILAE의 전체적인 분류에 따른 발작 유형에 대한 사망률의 전체 자료를 보고한 유일한 연구이다.

Funnel plot과 Galbraith plot (*figure e-1*)을 이용한 출판 바이어스의 평가는 큰 연구와 작은 연구의 편향된 분포를 보인다. Egger regression 검사는 통계적으로 유의한 높은 효과 추정치를 향하는 바이어스를 보여주었다(*p*=0.04). 소아 환자가 적고 높은 초과 사망률을 보이는 것처럼 연구 대상의 차이는 다양한

결과의 원인이 된다.<sup>28,30,39,40,42,48,52</sup> GRADE 체계에서 근거에 대한 질적인 점수가 최대 4점에서 3점이면 중등도의 근거 수준을 의미한다(*table e-3*). 큰 효과 크기는 질을 높이지만(+1), 다른 카테고리들은 전반적인 점수를 평가하기에는 충분하지 않다.

## 고 찰

우리가 알기로, 이 연구는 뇌전증과 연관된 임상적 특징과 초과 사망률을 포괄적으로 종합한 첫 번째 연구이다. 뇌전증의 병인은 모든 연령에서 조기 사망을 결정하는 주요 결정인자였다. 가장 주목할 만한 것은 특발뇌전증이 잠복뇌전증과 구분된 후에는 초과 사망률과 관계가 없다는 것이다(*table 2*). 또한, 발작이 소실되는 것은 관계가 되지 않은 환자와 비교하여 생존율이 개선되는 것을 보여주었다. 표준화되지 않고 완료되지 않은 보고가 많았고 최적화된 자료를 종합하는데 제한이 있었다.

뇌전증의 진단은 임상적이지만, 뇌전증의 병인은 주로 신경영상검사 및 EEG과 같은 조사의 강도와 관계가 있다.<sup>11,59</sup> 특히 사례 확인 이후 보다 장기간에 걸친 연구에서, MRI 대신 CT를 이용한 신경영상검사가 자주 이루어졌다. 또한, 국소피질형성 이상을 발견하는 민감도는 고해상 MRI 기법<sup>59,60</sup>을 폭넓게 사용하게 되면서 최근 증가하였고, 증상성(즉, 구조적) 병인의 수는 증가하고 기존에 잠복 분류되었던 뇌전증은 감소하였다. 모든 연구들은 전체적인 증상성 병인에서 상당히 사망률이 증가하는 것으로 보고하였지만(*table 2*), 통계적 이질성이 매우 높았다.

잠복뇌전증은 성인에서 초과 사망률이 거의 두 배(*table 2*)였고, 따라서, 확인된 뇌병변이 초과 사망률에 유일하게 기여하는 인자가 아닐 수 있다. 소아와 성인의 개별적 사례에 대한 인구기반 연구(*figure 3*)에서 무증상성 뇌전증에서는 사망률이 증가하지 않았다. 그러나, 모든 코호트 종류(병원기반 연구 포함)를 포함했을 때에는 초과 사망률이 1.6배로 유의하게 높았고, 이것은 약물 불응성 뇌전증 환자에 의한 것일 수 있다(*table 2*).

발작의 빈도에 따른 사망률을 보고한 모든 연구에서 발작 빈도가 최저인 카테고리에서 낮은 초과 사망률을 보였고 발작 빈도가 높은 환자에서는 상당히 증가하는 것으로 나타났다(*table 2*).<sup>19,35,36,40,47,50</sup> 이들 연구 중에서 두 가지는 개별적 뇌전증에 대해 보고하였다.<sup>35,40</sup> Mohanaraj 등<sup>35</sup>은 병원 표본에서 평균 뇌전증 발생 나이가 29세인 새로 진단된 환자 890명을 추적관찰하였다. 1년 동안 완전한 발작

Figure 3 Forest plot on mortality by etiology of epilepsy

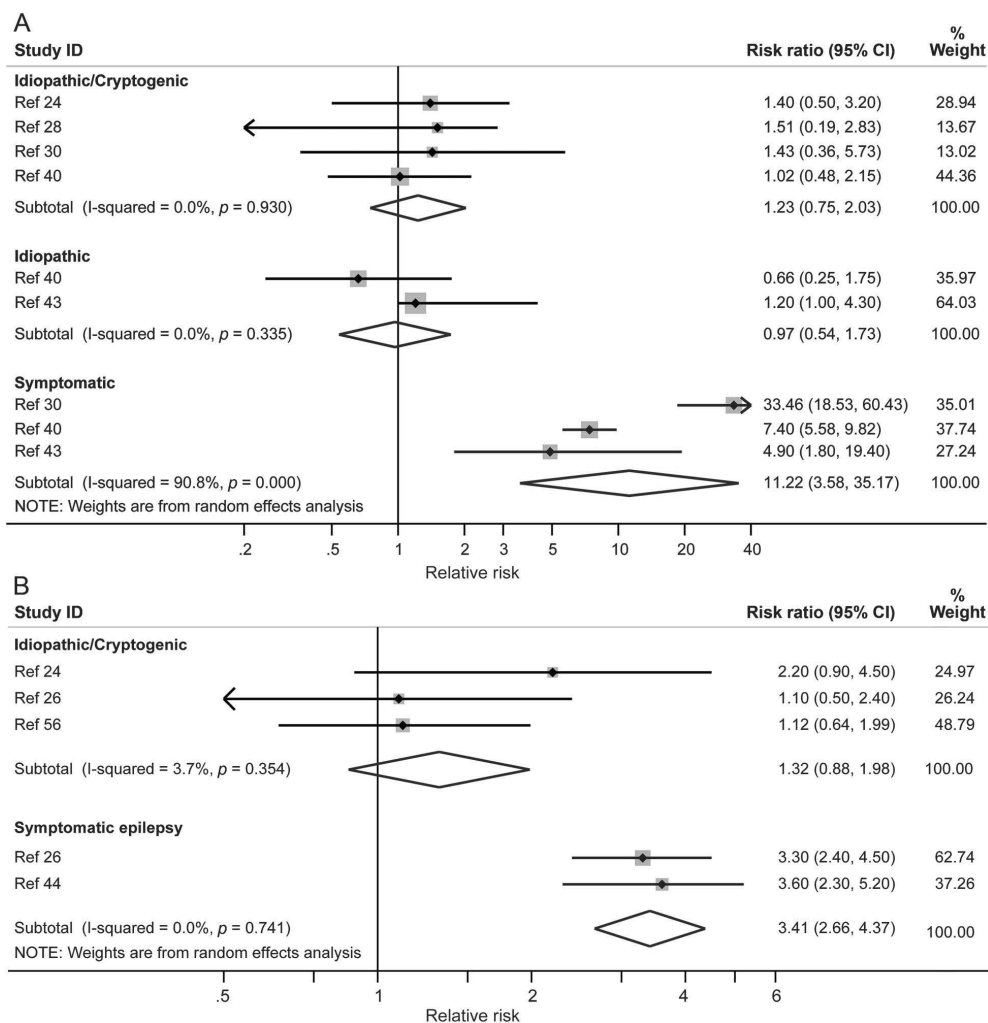

(A) Population-based incident cases with the diagnosis under 20 years of age. (B) Population-based incident cases with the diagnosis in adulthood. CI = confidence interval.

Table 2 Pooled relative excess mortality risk in epilepsy by clinical characteristics across all age groups, including population-based and representative hospital-based cohorts

| Etiology                                         | Incident cases |           |            |           | All cases (including prevalent) |           |            |           |
|--------------------------------------------------|----------------|-----------|------------|-----------|---------------------------------|-----------|------------|-----------|
|                                                  | Studies, n     | Pooled RR | 95% CI     | $I^2$ , % | Studies, n                      | Pooled RR | 95% CI     | $I^2$ , % |
| <b>Idiopathic/cryptogenic</b>                    | 7              | 1.56      | 1.36-1.79  | 0         | 9                               | 1.61      | 1.42-1.82  | 0         |
| <b>Idiopathic</b>                                | 4              | 1.29      | 0.75-2.20  | 36.3      | 5                               | 1.05      | 0.55-2.01  | 56.3      |
| <b>Cryptogenic</b>                               | 5              | 1.75      | 1.20-2.54  | 57.8      | 5                               | 1.75      | 1.20-2.54  | 57.8      |
| <b>Symptomatic</b>                               | 12             | 4.73      | 3.27-6.83  | 95.1      | 14                              | 4.48      | 3.24-6.21  | 94.3      |
| <b>Congenital or developmental causes</b>        | 2              | 10.27     | 4.03-26.17 | 69.6      | 2                               | 10.27     | 4.03-26.17 | 69.6      |
| <b>Seizures</b>                                  |                |           |            |           |                                 |           |            |           |
| <b>Seizure-free or 5-year terminal remission</b> | 2              | 0.97      | 0.73-1.30  | 0         | 6                               | 1.56      | 1.14-2.13  | 76.1      |
| <b>Highest seizure frequency category</b>        | 2              | 4.69      | 1.41-15.60 | 96.9      | 6                               | 4.65      | 2.70-8.01  | 97.0      |

Abbreviations: CI = confidence interval;  $I^2$ , % = the degree of statistical heterogeneity; pooled RR = pooled relative risk of death in epilepsy in a random-effects model.

소실은 항경련제를 사용하는 PWE의 52%에서 이루어졌다. 대조적으로, Sillanpää와 Shinnar<sup>40</sup>는

소아기에 뇌전증을 새로이 진단받은 150명의 환자를 대상으로 한 인구기반 코호트에서 5년 최종 관해를

발작 소실로 정의하였다. 통합 분석에서, 이 연구들은 관해에 도달한 새로이 뇌전증을 진단받은 환자에서는 사망의 위험도를 증가시키지 않았다(table 2). 다양한 병인 카테고리에서 발작 빈도가 사망률에 미치는 영향에 대한 미래의 연구들은 자세한 사망률 위험도를 평가하는데 유익한 방법이 될 것이다. 현재는 이것을 평가하는 메타분석은 없다. 기저 발작의 빈도에 의한 뇌전증 병인에 따라 계층화된 유일한 병원 기반 유병률 표본을 주목할 필요가 있는데, 이 연구에서 발작이 소실된 증상성 뇌전증 환자에서 2.9배의 초과 사망률이 관찰되었으며, 반면 한 달에 한 번 이상의 발작이 있는 환자는 6.3배의 높은 사망률을 보였다.<sup>47</sup>

뇌전증의 사망률에 대한 이전의 메타분석에서, Shackleton 등<sup>3</sup>은 21개의 뇌전증 코호트에서 유럽과 미국에서 추적관찰한 30,200명 이상의 환자를 분석하였다. 이 코호트 중 8개는 현재의 메타분석에 포함되었다.<sup>19,22-26,56,58</sup> 본 연구와는 반대로, Shackleton 등은 주거관리와 정신질환기관에 있는 PWE도 포함하였다. 47%의 사망률 변이는 등록 기준이 폭넓은 환자의 출처의 차이 때문이다. 인구기반 연구와 병원기반 연구 사이에 초과 사망률의 차이가 없었는데, 이것은 병원 표본이 고도로 선택된 부분 집단 대신 병원 수준에서 관찰되는 PWE의 대표적인 표본이기 때문일 것이다. Shackleton 등의 연구 이후, 통합적인 사망률 조사가 유럽과 미국 외에서 발표되었다.<sup>29,31-34,36-38,45,49,53</sup>

HDI가 낮은 국가인 우간다의 농촌 지역에서 시행된 유일한 하나의 인구기반 연구를 확인하였는데 환자군은 7배의 초과 사망률을 보였다.<sup>36</sup> 뇌전증과 같은 발작성 질환에서 통합적인 추적관찰 연구는 어렵고, 개발도상국에서 시행되는 것이 어려워 뇌전증 연관 사망률의 전세계적인 사망률의 추정치는 자원이 풍부한 나라에서 시행된 연구 쪽으로 편향된다.

여기서는 특별한 제한 없이 다양한 데이터베이스를 체계적으로 조사하였고 각 분야의 전문가와 접촉하여 연구의 완전성에 대해 확인하였다. 조사, 연구 확인, 자료 추출, NOS 점수의 배정은 객관성을 높이고 오류를 감소시키기 위해 중복으로 평가하였다. 단일 비유발성 발작이 있는 환자의 비율을 평가한 몇몇 보고<sup>23,24,26,37</sup>가 있는데 가장 높은 비율(29%)은 Lindsten 등<sup>26</sup>의 연구였다. 그러나 이러한 비율까지 포함한 것은 사망률 추정치의 크기에 영향을 주지 않았다.<sup>24,26</sup> 그 문헌의 나머지에서 이러한 환자가 포함될 수 있지만, 이는 보고되지 않았다. 보고가 되지 않거나 비표준화된 보고는 특정 임상양상에 대한 종합적인 평가를 어렵게 하거나(예: 발작 빈도) 불가능(예: 발작 종류, 뇌전증증후군)하게 하였다. 불응성 뇌전증에 대한

선택 바이어스는 병원기반 표본에서 더 많았고, 나머지 혼란변수는 불완전한 통계 조정으로 인해 연관성이 왜곡될 수 있다. 다섯 개의 코호트 연구<sup>29,46,47,51,54</sup>는 회귀모형에 기반하여 분석하였는데, 주요 동반 질환은 단지 두 개의 뇌전증 코호트에서 공변량으로 포함하였고 둘 다 덴마크의 연구였다.<sup>46,51</sup> 대부분의 연구는 효과 평가로서 SMRs을 보고하였다. SMR은 나이와 성별이 유사한 외부의 참고 인구에서 기대되는 사망률에 대하여 뇌전증 코호트에서 관찰된 사망자수의 통계이다. 따라서, 약간 상승한 SMR은 높은 배후의 사망률을 시사하며, 아르헨티나<sup>33</sup> 볼리비아<sup>37</sup> 그리고 인도 봄베이의 Parsi 인구에서 시행된 연구에서 PWE에서 초과 사망률이 확인되지 않았던 것은 이때문일 수 있다(figure 2).<sup>32</sup>

뇌전증 관련 초과 사망률은 모든 연령에서 뇌전증의 병인과 높은 관련이 있었다. 신경영상학적 이상소견이 없거나 다른 뇌전증의 원인이 확인되지 않는 성인 환자에서 사망의 위험은 특발뇌전증과 잠복뇌전증의 차이에 따라 다르다. 조기 사망의 위험은 특발뇌전증 환자와 발작이 소실된 PWE에서 가장 낮았다. 추정치는 대부분 고소득 국가로부터 산출된 반면 다른 지역에서의 뇌전증의 사망률에 대해서는 알려진 바가 적다. 연구에 있어 표준화된 절차는 향후 더 세밀한 메타분석을 가능하게 할 것이다.

## AUTHOR CONTRIBUTIONS

Olli Nevalainen: study design, literature search, study eligibility assessment, data extraction, statistical analysis, drafting of the manuscript, and final approval of the version to be published. Hanna Ansakorpi: study design, literature search, study eligibility assessment, data extraction, critical revision of the manuscript, and final approval of the version to be published. Mikko Simola: literature search, study eligibility assessment, data extraction, critical revision of the manuscript, and final approval of the version to be published. Jani Raitanen: study design, meta-regression, statistical analysis, figures, critical revision of the manuscript, and final approval of the final version to be published. Jouko Isojärvi: study design, critical revision of the manuscript, and final approval of the version to be published. Miia Artama: study design, critical revision of the manuscript, and final approval of the version to be published. Anssi Auvinen: study design, planning of analyses, critical revision of the manuscript, and final approval of the version to be published.

## ACKNOWLEDGMENT

The authors thank Prof. Matti Sillanpää, University of Turku, Finland, for providing previously unpublished mortality data on etiology and seizure remission status from the Turku Ageing in Childhood Onset Epilepsy (TACOE) study; and information specialist Maritta Tuhkio, Library of Health Sciences, University of Tampere, Finland, for assistance in developing the search strategy.

## STUDY FUNDING

Supported by Pirkanmaa Hospital District Competitive Research Funding.

## DISCLOSURE

Supported by Pirkanmaa Hospital District Competitive Research Funding.

Received March 20, 2014. Accepted in final form June 26, 2014.

## REFERENCES

1. Ngugi AK, Bottomley C, Kleinschmidt I, Sander JW, Newton CR. Estimation of the burden of active and lifetime epilepsy: a meta-analytic approach. *Epilepsia* 2010;51:883–890.
2. Murray CJ, Vos T, Lozano R, et al. Disability-adjusted life years (DALYs) for 291 diseases and injuries in 21 regions, 1990–2010: a systematic analysis for the Global Burden of Disease Study 2010. *Lancet* 2012;380:2197–2223.
3. Shackleton DP, Westendorp RG, Kasteleijn-Nolst Trenite DG, de Craen AJ, Vandenbroucke JP. Survival of patients with epilepsy: an estimate of the mortality risk. *Epilepsia* 2002;43:445–450.
4. Forsgren L, Hauser WA, Olafsson E, Sander JW, Sillanpää M, Tomson T. Mortality of epilepsy in developed countries: a review. *Epilepsia* 2005;46(suppl 11):18–27.
5. Fazel S, Wolf A, Långström N, Newton CR, Lichtenstein P. Premature mortality in epilepsy and the role of psychiatric comorbidity: a total population study. *Lancet* 2013;382:1646–1654.
6. Shorvon S, Tomson T. Sudden unexpected death in epilepsy. *Lancet* 2011;378:2028–2038.
7. Moher D, Liberati A, Tetzlaff J, Altman DG. Preferred reporting items for systematic reviews and meta-analyses: the PRISMA statement. *Ann Intern Med* 2009;151:264–269.
8. Stroup DF, Berlin JA, Morton SC, et al. Meta-analysis of observational studies in epidemiology: a proposal for reporting: Meta-analysis Of Observational Studies in Epidemiology (MOOSE) group. *JAMA* 2000;283:2008–2012.
9. Moons KG, Royston P, Vergouwe Y, Grobbee DE, Altman DG. Prognosis and prognostic research: what, why, and how? *BMJ* 2009;338:b375.
10. Thurman DJ, Beghi E, Begley CE, et al. Standards for epidemiologic studies and surveillance of epilepsy. *Epilepsia* 2011;52(suppl 7):2–26.
11. Berg AT, Berkovic SF, Brodie MJ, et al. Revised terminology and concepts for organization of seizures and epilepsies: report of the ILAE commission on classification and terminology, 2005–2009. *Epilepsia* 2010;51:676–685.
12. Human Development Report 2010: 20th Anniversary Edition. New York: United Nations Development Program; 2010.
13. Wells GA, Shea B, O'Connell D, et al. The Newcastle-Ottawa Scale (NOS) for assessing the quality of nonrandomized studies in meta-analyses. Proceedings of the 3rd Symposium on Systematic Reviews: Beyond the Basics; Oxford, July 3–5, 2000.
14. Balshem H, Helfand M, Schunemann HJ, et al. GRADE guidelines: 3: rating the quality of evidence. *J Clin Epidemiol* 2011;64:401–406.
15. Breslow NE, Day NE. *Statistical Methods in Cancer Research: Volume II: The Design and Analysis of Cohort Studies*. Lyon, France: IARC Scientific; 1987:1–406.
16. Higgins JP, Thompson SG. Quantifying heterogeneity in a meta-analysis. *Stat Med* 2002;21:1539–1558.
17. Egger M, Davey Smith G, Schneider M, Minder C. Bias in meta-analysis detected by a simple, graphical test. *BMJ* 1997;315:629–634.
18. Galbraith RF. A note on graphical presentation of estimated odds ratios from several clinical trials. *Stat Med* 1988;7:889–894.
19. Henriksen B, Juul-Jensen P, Lund M. The mortality of epileptics. In: Brackenridge RDC, ed. Proceedings of the 10th International Congress of Life Insurance Medicine. London: Pitman, 1970;139–148.
20. Erilä T. Mortality in patients with epilepsy in Finland 1967–1973. *Acta Universitatis Tamperensis Ser A* 1982;145:1–167.
21. Annegers JF, Hauser WA, Shirts SB. Heart disease mortality and morbidity in patients with epilepsy. *Epilepsia* 1984;25:699–704.
22. Nashef L, Fish DR, Sander JW, Shorvon SD. Incidence of sudden unexpected death in an adult outpatient cohort with epilepsy at a tertiary referral centre. *J Neurol Neurosurg Psychiatry* 1995;58:462–464.
23. Nilsson L, Tomson T, Farahmand BY, Diwan V, Persson PG. Cause-specific mortality in epilepsy: a cohort study of more than 9,000 patients once hospitalized for epilepsy. *Epilepsia* 1997;38:1062–1068.
24. Olafsson E, Hauser WA, Gudmundsson G. Long-term survival of people with unprovoked seizures: a population-based study. *Epilepsia* 1998;39:89–92.
25. Shackleton DP, Westendorp RG, Trenite DG, Vandenbroucke JP. Mortality in patients with epilepsy: 40 years of follow up in a Dutch cohort study. *J Neurol Neurosurg Psychiatry* 1999;66:636–640.
26. Lindsten H, Nyström L, Forsgren L. Mortality risk in an adult cohort with a newly diagnosed unprovoked epileptic seizure: a population-based study. *Epilepsia* 2000;41:1469–1473.
27. Morgan CL, Kerr MP. Epilepsy and mortality: a record linkage study in a U.K. population. *Epilepsia* 2002;43:1251–1255.
28. Camfield CS, Camfield PR, Veugelers PJ. Death in children with epilepsy: a population-based study. *Lancet* 2002;359:1891–1895.
29. Kamgno J, Pion SD, Boussinesq M. Demographic impact of epilepsy in Africa: results of a 10-year cohort study in a rural area of Cameroon. *Epilepsia* 2003;44:956–963.
30. Berg AT, Shinnar S, Testa FM, Levy SR, Smith SN, Beckerman B. Mortality in childhood-onset epilepsy. *Arch Pediatr Adolesc Med* 2004;158:1147–1152.
31. Davilat-Barros M, Rivera Gómez G, Gómez-Munoz V, Sepúlveda-Olmos JP. Mortalidad en niños con epilepsia: estudio clínico prospectivo. *Acta Neurol Colomb* 2004;20:51–61.
32. Carpio A, Bharucha NE, Jallon P, et al. Mortality of epilepsy in developing countries. *Epilepsia* 2005;46 (suppl 11):28–32.
33. Kochen S, Melcon MO. Prognosis of epilepsy in a community-based study: 8 years of follow-up in an Argentine community. *Acta Neurol Scand* 2005;112:370–374.
34. Chen RC, Chang YC, Chen TH, Wu HM, Liou HH. Mortality in adult patients with epilepsy in Taiwan. *Epileptic Disord* 2005;7:213–219.
35. Mohanraj R, Norrie J, Stephen LJ, Kelly K, Hitiris N, Brodie MJ. Mortality in adults with newly diagnosed and chronic epilepsy: a retrospective comparative study. *Lancet Neurol* 2006;5:481–487.
36. Kaiser C, Asaba G, Kasoro S, Rubaale T, Kabagambe G, Mbabazi M. Mortality from epilepsy in an onchocerciasis endemic area in West Uganda. *Trans R Soc Trop Med Hyg* 2007;101:48–55.
37. Nicoletti A, Sofia V, Vitale G, et al. Natural history and mortality of chronic epilepsy in an untreated population of rural Bolivia: a follow-up after 10 years. *Epilepsia* 2009;50:2199–2206.
38. Banerjee TK, Ray BK, Das SK, et al. A longitudinal study of epilepsy in Kolkata, India. *Epilepsia* 2010;51:2384–2391.
39. Geerts A, Arts WF, Stroink H, et al. Course and outcome of childhood epilepsy: a 15-year follow-up of the Dutch Study of Epilepsy in Childhood. *Epilepsia* 2010;51:1189–1197.
40. Sillanpää M, Shinnar S. Long-term mortality in childhood-onset epilepsy. *N Engl J Med* 2010;363:2522–2529.
41. Neligan A, Bell GS, Johnson AL, Goodridge DM, Shorvon SD, Sander JW. The long-term risk of premature mortality in people with epilepsy. *Brain* 2011;134:388–395.
42. Ackers R, Besag FM, Hughes E, Squier W, Murray ML, Wong IC. Mortality rates and causes of death in children with epilepsy prescribed antiepileptic drugs: a retrospective cohort study using the UK General Practice Research Database. *Drug Saf* 2011;34:403–413.



43. Chin RF, Cumberland PM, Pujar SS, Peckham C, Ross EM, Scott RC. Outcomes of childhood epilepsy at age 33 years: a population-based birth-cohort study. *Epilepsia* 2011;52:1513–1521.
44. Rakitin A, Liik M, Oun A, Haldre S. Mortality risk in adults with newly diagnosed and chronic epilepsy: a population-based study. *Eur J Neurol* 2011;18:465–470.
45. Mu J, Liu L, Zhang Q, et al. Causes of death among people with convulsive epilepsy in rural West China: a prospective study. *Neurology* 2011;77:132–137.
46. Olesen JB, Abildstrom SZ, Erdal J, et al. Effects of epilepsy and selected antiepileptic drugs on risk of myocardial infarction, stroke, and death in patients with or without previous stroke: a nationwide cohort study. *Pharmacoepidemiol Drug Saf* 2011;20:964–971.
47. Nevalainen O, Auvinen A, Ansakorpi H, Artama M, Raitanen J, Isojärvi J. Mortality by clinical characteristics in a tertiary care cohort of adult patients with chronic epilepsy. *Epilepsia* 2012;53:e212–e214.
48. Nickels KC, Grossardt BR, Wirrell EC. Epilepsy-related mortality is low in children: a 30-year population-based study in Olmsted County, MN. *Epilepsia* 2012;53:2164–2171.
49. Chang YH, Ho WC, Tsai JJ, Li CY, Lu TH. Risk of mortality among patients with epilepsy in southern Taiwan. *Seizure* 2012;21:254–259.
50. Trinka E, Bauer G, Oberaigner W, Ndayisaba JP, Seppi K, Granbichler CA. Cause-specific mortality among patients with epilepsy: results from a 30-year cohort study. *Epilepsia* 2013;54:495–501.
51. Holst AG, Winkel BG, Risgaard B, et al. Epilepsy and risk of death and sudden unexpected death in the young: a nationwide study. *Epilepsia* 2013;54:1613–1620.
52. Moseley BD, Wirrell EC, Wong-Kissel LC, Nickels K. Early onset epilepsy is associated with increased mortality: a population-based study. *Epilepsy Res* 2013;105:410–414.
53. Ding D, Wang W, Wu J, et al. Premature mortality risk in people with convulsive epilepsy: long follow-up of a cohort in rural China. *Epilepsia* 2013;54:512–517.
54. Nevalainen O, Raitanen J, Ansakorpi H, Artama M, Isojärvi J, Auvinen A. Long-term mortality risk by cause of death in newly diagnosed patients with epilepsy in Finland: a nationwide register-based study. *Eur J Epidemiol* 2013;28:981–990.
55. Kobulashvili T, Lomidze G, Kasradze S, Sander JW. Premature mortality in a Georgian cohort of people with epilepsy. *Epilepsy Res* 2013;107:318–322.
56. Lhatoo SD, Johnson AL, Goodridge DM, MacDonald BK, Sander JW, Shorvon SD. Mortality in epilepsy in the first 11 to 14 years after diagnosis: multivariate analysis of a longterm, prospective, population-based cohort. *Ann Neurol* 2001;49:336–344.
57. Commission on Classification and Terminology of the International League Against Epilepsy. Proposal for revised classification of epilepsies and epileptic syndromes. *Epilepsia* 1989;30:389–399.
58. Hauser WA, Annegers JF, Elveback LR. Mortality in patients with epilepsy. *Epilepsia* 1980;21:399–412.
59. Shorvon SD. The etiologic classification of epilepsy. *Epilepsia* 2011;52:1052–1057.
60. Woermann FG, Vollmar C. Clinical MRI in children and adults with focal epilepsy: a critical review. *Epilepsy Behav* 2009;15:40–49.
